# Supplementary material for: Assessment of Educational Quality and Associated Factors: The Case of Arba Minch College of Health Sciences in 2017, South Ethiopia
Source: Hindawi journal article supplement (doi:10.1155/2021/8854366), 2021-03-18
Supplement: f1 [file 8854366.f1.docx]

# ANNEX-II: QUESTIONNAIRE

#### English version Questionnaire

Questionnaire for the data collection on the assessment of the quality of Arba Minch college of health science education using higher education quality assessment model in 2017

**Identification**

Name of the institution: _______________________ department: _______________ Questionnaire code no. _______________________ Date: ______________

Verbal consent form before conducting the interview

Hello! My name is Mr./Mrs. _______________. Today I am here to collect data on the quality of Arba Minch College of Health Science education using higher education quality assessment model

The objective of this study is to assess the quality of Arba Minch College of Health Science education using higher education quality assessment model in 2017

I would like to assure you that the study is confidential. You will not keep a record of your name and address. You have a right to stop the interview at any time, or to skip any question that you do not want to answer. Your correct answer to the questions can make the study achieve its goal. Therefore, you are kindly requested to respond genuinely and voluntary with patience.

Do you have any question?

Are you willing to participate in the interview?

[ ] Yes, Go to the next page

[ ] No, Thank them and interrupt the interview

**INSTRUCTIONS:**

- **Please for all questions provided in the following tables encircle appropriate answer given on the columns next to each questions**

**Part one: Background Information**

| No | Questions | Answer | Remark |
| --- | --- | --- | --- |
| 001 | Sex | 1. Male 2. Female |  |
| 002 | Age (years) | ______________ |  |
| 003 | Ethnicity | _______________ |  |
| 004 | Educational status | 1. Student 2. BSc 3. Masters and above |  |
| 005 | What is your Marital Status? | 1. Single 2. Married 3. Divorced/Separated 4. Widowed |  |
| 006 | Academic year/experience | ___ years (2nd /3rd for students) |  |
| 007 | Unit/department | ________________ |  |
| 008 | distance from college | ____________(in kms) |  |
| 09 | weekly load | ____________________ |  |
| 010 | The original Residence of respondent | 1. Urban 2. Rural |  |
| 011 | Monthly income (in birr) of respondent(sum) | _________________ |  |

**Part II**: questions on main and sub model elements

For these scale questions: respond as **1-strongly disagree, 2-disagree,3-neutral,4-agree & 5-strongly** agree after clear understanding of question.

|  | Quality education | | | 1 | 2 | 3 | 4 | 5 |
| --- | --- | --- | --- | --- | --- | --- | --- | --- |
| 1 | Quality curriculum for good development & available market | | |  |  |  |  |  |
| 2 | Quality staff equipping students sufficiently in the college | | |  |  |  |  |  |
| 3 | Quality administrative services in the college | | |  |  |  |  |  |
| 4 | Quality library services in the college | | |  |  |  |  |  |
| 5 | Quality e-services in the college | | |  |  |  |  |  |
| 6 | Quality and adequate infrastructure for every service in the college | | |  |  |  |  |  |
| 7 | The college located at safe and optimal distance from every direction | | |  |  |  |  |  |
| 8 | The college education prepares for quality career prospective | | |  |  |  |  |  |
|  | | | | |
| 1 | | The program provides the appropriate enough selective topics/departments | 1. Yes 2. No | |
| 2 | | The curriculum line with requirement of the labor market | 1. Yes 2. No | |
| 3 | | The curriculum enhances students skill and self-capabilities | 1. Yes 2. No | |
| 4 | | Variety of elective modules/modules on specialization area to review | 1. Yes 2. No | |
| 5 | | Appropriate and accessible Weekly time table | 1. Yes 2. No | |
| 6 | | Appropriate assessment guidelines available for all type courses | 1. Yes 2. No | |
| 7 | | Have good Professional experience to teach and share | 1. Yes 2. No | |
| 8 | | The staffs are engaged in Research activities to help teaching | 1. Yes 2. No | |
| 9 | | The college is cooperative and responsive in all aspects | 1. Yes 2. No | |
| 10 | | Availability appropriate academic advising | 1. Yes 2. No | |
| 11 | | Availability of communication skill throughout the college | 1. Yes 2. No | |
| 12 | | Good perspectives for professional career or development | 1. Yes 2. No | |
| 13 | | Institution’s has good link with business or facilities that easy inhering | 1. Yes 2. No | |
| 14 | | The teaching in the college Enhances technical skill for good career | 1. Yes 2. No | |
| 15 | | Availability of exchange programs with other institutions(free movement to study of work to similar colleges) | 1. Yes 2. No | |
| 16 | | Modern and higher quality laboratories/demonstration/ | 1. Yes 2. No | |
| 17 | | Standard Catering service | 1. Yes 2. No | |
| 18 | | Availability of Sport facilities | 1. Yes 2. No | |
| 19 | | Availability of Medical facilities | 1. Yes 2. No | |
| 20 | | High quality good administration buildings | 1. Yes 2. No | |
| 21 | | Availability of service to host social and cultural events | 1. Yes 2. No | |
| 22 | | The college website provides academic and administrative services | 1. Yes 2. No | |
| 23 | | Availability of e-service through social networks | 1. Yes 2. No | |
| 24 | | Availability of text books and journals for students and instructors | 1. Yes 2. No | |
| 25 | | Easy borrowing process in library | 1. Yes 2. No | |
| 26 | | Sufficient place of sit and read in library | 1. Yes 2. No | |
| 27 | | Sufficient working for enough hours | 1. Yes 2. No | |
| 28 | | Effective , accurate and prompt service | 1. Yes 2. No | |
| 29 | | Clear guideline and advice | 1. Yes 2. No | |
| 30 | | Friendliness of staffs to each other and students | 1. Yes 2. No | |
| 31 | | Availability of Safety and security department | 1. Yes 2. No | |
| 32 | | Accessibility of the college | 1. Yes 2. No | |
| 33 | | Availability of transportation services (out of college) | 1. Yes 2. No | |
